# Supplementary material for: Phase 1 Study of THR-687, a Novel, Highly Potent Integrin Antagonist for the Treatment of Diabetic Macular Edema
Source: PubMed Central journal article supplement — Ophthalmol Sci. 2021 Jul 14;1(3):100040. doi: 10.1016/j.xops.2021.100040 (PMC9562295; doi:10.1016/j.xops.2021.100040), 2021-07-14
Supplement: mmc1.pdf [file mmc1.pdf]

**Supplemental Table 1. Key Inclusion and Exclusion Criteria.**

| <b>Inclusion criteria</b>                                                                                                                                                                                                                                                                                                                                                                                                                                                                                                                                                                                                                                                                                                                                                                                                                                         |
|-------------------------------------------------------------------------------------------------------------------------------------------------------------------------------------------------------------------------------------------------------------------------------------------------------------------------------------------------------------------------------------------------------------------------------------------------------------------------------------------------------------------------------------------------------------------------------------------------------------------------------------------------------------------------------------------------------------------------------------------------------------------------------------------------------------------------------------------------------------------|
| <ul style="list-style-type: none"><li>• Male or female aged 18 years or older</li><li>• Type 1 or type 2 Diabetes Mellitus</li><li>• CI-DME with CST of <math>\geq 320\mu\text{m}</math> on Spectralis® SD-OCT</li><li>• BCVA <math>\leq 62</math> and <math>\geq 23</math> ETDRS letter score in the study eye</li><li>• History of response to anti-VEGF agents and/or corticosteroids and, in the opinion of the Investigator, remained responsive to treatment</li><li>• Written informed consent obtained from the subject prior to screening procedures</li></ul>                                                                                                                                                                                                                                                                                           |
| <b>Exclusion criteria</b>                                                                                                                                                                                                                                                                                                                                                                                                                                                                                                                                                                                                                                                                                                                                                                                                                                         |
| <ul style="list-style-type: none"><li>• Macular edema due to causes other than DME</li><li>• Concurrent disease in the study eye, other than CI-DME, that could compromise BCVA, require medical or surgical intervention during the study period or could confound interpretation of the results</li><li>• Any condition that could confound the ability to detect a change in CST in the study eye</li><li>• Previous confounding treatments / procedures, or expected to require confounding treatments / procedures at any time during the study period</li><li>• Presence of neovascularization at the disc in the study eye</li><li>• Uncontrolled glaucoma in the study eye</li><li>• Any active ocular / intra-ocular infection or inflammation in either eye</li><li>• Poorly controlled Diabetes Mellitus</li><li>• Uncontrolled hypertension</li></ul> |

BCVA = best-corrected visual acuity; CI-DME = center-involved diabetic macular edema; CST = central subfield thickness; DME = diabetic macular edema; ETDRS = international clinical diabetic retinopathy disease severity scale; SD-OCT = spectral domain optical coherence tomography
